# Supplementary material for: Leucine Deprivation Increases Hepatic Insulin Sensitivity via GCN2/mTOR/S6K1 and AMPK Pathways
Source: PubMed Central journal article supplement — Diabetes. 2011 Feb 21;60(3):746–56. doi: 10.2337/db10-1246 (PMC3046835; doi:10.2337/db10-1246), 2011-02-21

SUPPLEMENTARY DATA

**Supplementary Figure 1. Serum levels of amino acids in mice fed a control or leucine-deficient diet for 7 days.** Amino acid levels were determined by standard ion exchange chromatography using a Beckman 6300 automated amino acid analyzer.

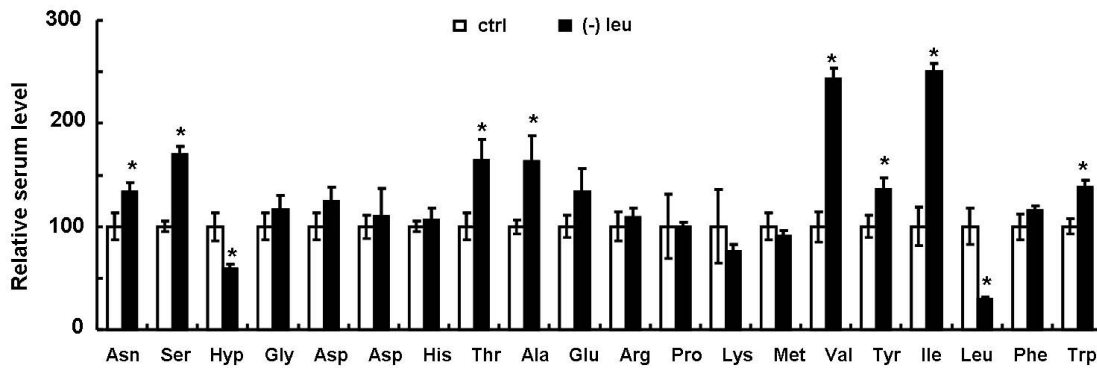

Supplement: supp_db10-1246_DB101246SupplementaryData.pdf [file supp_db10-1246_DB101246SupplementaryData.pdf]
